# Supplementary material for: CHRNA7 Polymorphisms and Dementia Risk: Interactions with Apolipoprotein ε4 and Cigarette Smoking
Source: PubMed Central journal article supplement (PMC4890170; doi:10.1038/srep27231), 2016-06-02
Supplement: srep27231-s1.pdf [file srep27231-s1.pdf]

## Supplementary information

### ***CHRNA7* Polymorphisms and Dementia Risk: Interactions with Apolipoprotein $\epsilon 4$ and Cigarette Smoking**

Pei-Hsuan Weng<sup>1,2</sup>, Jen-Hau Chen<sup>2,3</sup>, Ta-Fu Chen<sup>4</sup>, Yu Sun<sup>5</sup>, Li-Li Wen<sup>6</sup>, Ping-Keung Yip<sup>7,8</sup>, Yi-Min Chu<sup>9</sup> & Yen-Ching Chen<sup>2,10,11\*</sup>

<sup>1</sup> Department of Family Medicine, Taiwan Adventist Hospital, Taipei, Taiwan.

<sup>2</sup> Institute of Epidemiology and Preventive Medicine, College of Public Health, National Taiwan University, Taipei, Taiwan.

<sup>3</sup> Department of Geriatrics and Gerontology, National Taiwan University, Taipei, Taiwan.

<sup>4</sup> Department of Neurology, National Taiwan University Hospital, Taipei, Taiwan.

<sup>5</sup> Department of Neurology, En Chu Kong Hospital, Taipei, Taiwan.

<sup>6</sup> Department of Laboratory Medicine, En Chu Kong Hospital, Taipei, Taiwan.

<sup>7</sup> School of Medicine, Fu-Jen Catholic University, New Taipei City, Taiwan.

<sup>8</sup> Center of Neurological Medicine, Cardinal Tien Hospital, Taipei, Taiwan.

<sup>9</sup> Department of Laboratory Medicine, Cardinal Tien Hospital, Taipei, Taiwan.

<sup>10</sup> Department of Public Health, College of Public Health, National Taiwan University, Taipei, Taiwan.

<sup>11</sup> Research Center for Genes, Environment and Human Health, College of Public Health, National Taiwan University, Taipei, Taiwan.

\*Correspondence to:

Yen-Ching Chen, ScD.

Institute of Epidemiology and Preventive Medicine,  
National Taiwan University,

No.17 Xu-Zhou Road, Taipei 10055, Taiwan.

(O) 886-2-3366-8019

(Fax) 886-2-2351-1955

E-mail: [karenchen@ntu.edu.tw](mailto:karenchen@ntu.edu.tw)

**Supplementary Table S1. Association between *CHRNA7* haplotypes and LOAD by *APOE*  $\epsilon$ 4 status.**

| Haplo-<br>type<br>Block | Haplotype<br>(frequency among<br>controls) |                              | Dominant model   |      |                  |                         |                          |
|-------------------------|--------------------------------------------|------------------------------|------------------|------|------------------|-------------------------|--------------------------|
|                         |                                            |                              | 0 copies         |      | 1 or 2 copies    |                         | $P_{\text{interaction}}$ |
|                         |                                            |                              | Case/<br>Control | AOR  | Case/<br>Control | AOR (95% CI)            |                          |
| 1                       | Hap1: TC<br>(59%)                          | All                          | 57/69            | 1.00 | 197/366          | <b>0.51 (0.30-0.86)</b> | 0.50                     |
|                         |                                            | <i>APOE</i> $\epsilon$ 4 (-) | 35/58            | 1.00 | 119/310          | <b>0.44 (0.24-0.82)</b> |                          |
|                         |                                            | <i>APOE</i> $\epsilon$ 4 (+) | 22/10            | 1.00 | 77/55            | 0.76 (0.28-2.07)        |                          |
| 1                       | Hap2: GC<br>(30%)                          | All                          | 121/209          | 1.00 | 133/226          | 1.47 (0.96-2.23)        | 0.33                     |
|                         |                                            | <i>APOE</i> $\epsilon$ 4 (-) | 70/173           | 1.00 | 84/195           | 1.27 (0.77-2.08)        |                          |
|                         |                                            | <i>APOE</i> $\epsilon$ 4 (+) | 49/36            | 1.00 | 50/29            | 1.88 (0.83-4.26)        |                          |
| 1                       | Hap3: GG<br>(11%)                          | All                          | 185/350          | 1.00 | 69/85            | 1.52 (0.92-2.51)        | 0.67                     |
|                         |                                            | <i>APOE</i> $\epsilon$ 4 (-) | 114/296          | 1.00 | 40/72            | 1.50 (0.83-2.72)        |                          |
|                         |                                            | <i>APOE</i> $\epsilon$ 4 (+) | 71/52            | 1.00 | 28/13            | 1.68 (0.64-4.47)        |                          |
| 3                       | Hap1: ATCT<br>(31%)                        | All                          | 137/206          | 1.00 | 117/229          | 0.70 (0.45-1.09)        | 0.28                     |
|                         |                                            | <i>APOE</i> $\epsilon$ 4 (-) | 88/171           | 1.00 | 66/197           | 0.62 (0.37-1.04)        |                          |
|                         |                                            | <i>APOE</i> $\epsilon$ 4 (+) | 48/34            | 1.00 | 51/31            | 1.19 (0.51-2.80)        |                          |
| 3                       | Hap2: TTTT<br>(27%)                        | All                          | 135/233          | 1.00 | 119/202          | 0.97 (0.63-1.50)        | 0.96                     |
|                         |                                            | <i>APOE</i> $\epsilon$ 4 (-) | 87/202           | 1.00 | 67/166           | 0.96 (0.58-1.60)        |                          |
|                         |                                            | <i>APOE</i> $\epsilon$ 4 (+) | 47/31            | 1.00 | 52/34            | 0.96 (0.42-2.23)        |                          |
| 3                       | Hap3: ACCC<br>(20%)                        | All                          | 146/274          | 1.00 | 108/161          | 1.22 (0.78-1.90)        | 0.17                     |
|                         |                                            | <i>APOE</i> $\epsilon$ 4 (-) | 83/228           | 1.00 | 71/140           | 1.43 (0.86-2.39)        |                          |
|                         |                                            | <i>APOE</i> $\epsilon$ 4 (+) | 62/44            | 1.00 | 37/21            | 0.75 (0.30-1.86)        |                          |
| 3                       | Hap4: TTTC<br>(7%)                         | All                          | 227/372          | 1.00 | 27/63            | 0.54 (0.28-1.05)        | 0.88                     |
|                         |                                            | <i>APOE</i> $\epsilon$ 4 (-) | 139/318          | 1.00 | 15/50            | 0.57 (0.25-1.29)        |                          |
|                         |                                            | <i>APOE</i> $\epsilon$ 4 (+) | 87/52            | 1.00 | 12/13            | 0.47 (0.16-1.44)        |                          |
| 3                       | Hap5: TCCC<br>(6%)                         | All                          | 219/382          | 1.00 | 35/53            | 1.40 (0.74-2.67)        | 0.86                     |
|                         |                                            | <i>APOE</i> $\epsilon$ 4 (-) | 130/326          | 1.00 | 24/42            | 1.42 (0.67-2.98)        |                          |
|                         |                                            | <i>APOE</i> $\epsilon$ 4 (+) | 87/55            | 1.00 | 12/10            | 1.17 (0.31-4.46)        |                          |

Numbers in bold indicate significant findings ( $P < 0.05$ ). The effects of *CHRNA7* haplotypes in block4

on LOAD risk are shown in Table 3 because the results remained significant after correction for multiple tests. Block2 included only one htSNP and was excluded from the haplotype analysis.

Abbreviations: LOAD, late-onset Alzheimer's disease; AOR, adjusted odds ratio; CI, confidence interval; *APOE*, apolipoprotein E. Block 2 included only one haplotype-tagging single nucleotide polymorphism and thus was not included in the haplotype analysis. All models were adjusted for age, sex, *APOE*  $\epsilon$ 4, and education years and conditional on 5-year age strata.

**Supplementary Table S2. Association between *CHRNA7* haplotypes and VaD by *APOE*  $\epsilon$ 4 status.**

| Haplo-<br>type<br>Block | Haplotype<br>(frequency among<br>controls) |                              | Dominant model   |      |                  |                         | $P_{\text{interaction}}$ |
|-------------------------|--------------------------------------------|------------------------------|------------------|------|------------------|-------------------------|--------------------------|
|                         |                                            |                              | 0 copies         |      | 1 or 2 copies    |                         |                          |
|                         |                                            |                              | Case/<br>Control | AOR  | Case/<br>Control | AOR (95% CI)            |                          |
| 1                       | Hap1: TC<br>(59%)                          | All                          | 18/60            | 1.00 | 97/365           | 1.05 (0.49-2.26)        | 0.21                     |
|                         |                                            | <i>APOE</i> $\epsilon$ 4 (-) | 17/50            | 1.00 | 72/310           | 0.86 (0.37-2.00)        |                          |
|                         |                                            | <i>APOE</i> $\epsilon$ 4(+)  | 1/10             | 1.00 | 25/55            | 4.18 (0.40-44.0)        |                          |
| 1                       | Hap2: GC<br>(30%)                          | All                          | 60/208           | 1.00 | 55/225           | 0.88 (0.51-1.52)        | 0.50                     |
|                         |                                            | <i>APOE</i> $\epsilon$ 4 (-) | 44/172           | 1.00 | 45/196           | 0.77 (0.41-1.43)        |                          |
|                         |                                            | <i>APOE</i> $\epsilon$ 4(+)  | 16/36            | 1.00 | 10/29            | 1.05 (0.29-3.83)        |                          |
| 1                       | Hap3: GG<br>(11%)                          | All                          | 92/349           | 1.00 | 23/84            | 1.19 (0.60-2.35)        | 0.39                     |
|                         |                                            | <i>APOE</i> $\epsilon$ 4 (-) | 69/297           | 1.00 | 20/71            | 1.07 (0.50-2.28)        |                          |
|                         |                                            | <i>APOE</i> $\epsilon$ 4(+)  | 23/52            | 1.00 | 3/13             | 2.10 (0.38-11.7)        |                          |
| 3                       | Hap1: ATCT<br>(31%)                        | All                          | 63/205           | 1.00 | 52/228           | 0.86 (0.49-1.50)        | 0.94                     |
|                         |                                            | <i>APOE</i> $\epsilon$ 4 (-) | 49/171           | 1.00 | 40/197           | 0.87 (0.46-1.65)        |                          |
|                         |                                            | <i>APOE</i> $\epsilon$ 4(+)  | 14/34            | 1.00 | 12/31            | 0.93 (0.28-3.03)        |                          |
| 3                       | Hap2: TTTT<br>(27%)                        | All                          | 63/234           | 1.00 | 52/199           | 0.97 (0.56-1.71)        | 0.89                     |
|                         |                                            | <i>APOE</i> $\epsilon$ 4 (-) | 49/202           | 1.00 | 40/166           | 0.97 (0.51-1.85)        |                          |
|                         |                                            | <i>APOE</i> $\epsilon$ 4(+)  | 14/32            | 1.00 | 12/33            | 1.11 (0.30-4.05)        |                          |
| 3                       | Hap3: ACCC<br>(20%)                        | All                          | 66/274           | 1.00 | 49/159           | 1.34 (0.76-2.38)        | 0.72                     |
|                         |                                            | <i>APOE</i> $\epsilon$ 4 (-) | 51/230           | 1.00 | 38/138           | 1.40 (0.73-2.69)        |                          |
|                         |                                            | <i>APOE</i> $\epsilon$ 4(+)  | 15/44            | 1.00 | 11/21            | 1.36 (0.36-5.06)        |                          |
| 3                       | Hap4: TTTC<br>(7%)                         | All                          | 103/373          | 1.00 | 12/60            | <b>0.33 (0.12-0.88)</b> | 0.42                     |
|                         |                                            | <i>APOE</i> $\epsilon$ 4 (-) | 80/321           | 1.00 | 9/47             | 0.40 (0.13-1.20)        |                          |
|                         |                                            | <i>APOE</i> $\epsilon$ 4(+)  | 23/52            | 1.00 | 3/13             | 0.17 (0.02-1.48)        |                          |
| 3                       | Hap5: TCCC<br>(6%)                         | All                          | 95/381           | 1.00 | 20/52            | 1.63 (0.73-3.61)        | 0.61                     |
|                         |                                            | <i>APOE</i> $\epsilon$ 4 (-) | 73/326           | 1.00 | 16/42            | 1.86 (0.76-4.59)        |                          |
|                         |                                            | <i>APOE</i> $\epsilon$ 4(+)  | 22/55            | 1.00 | 4/10             | 1.01 (0.13-7.91)        |                          |
| 4                       | Hap1: AC<br>(76%)                          | All                          | 6/33             | 1.00 | 109/400          | 1.30 (0.42-3.97)        | 0.86                     |
|                         |                                            | <i>APOE</i> $\epsilon$ 4 (-) | 6/27             | 1.00 | 83/341           | 1.13 (0.35-3.66)        |                          |
|                         |                                            | <i>APOE</i> $\epsilon$ 4(+)  | 0/6              | 1.00 | 26/59            | NA                      |                          |
| 4                       | Hap2: AT<br>(15%)                          | All                          | 89/321           | 1.00 | 26/112           | 1.07 (0.57-2.00)        | 0.76                     |
|                         |                                            | <i>APOE</i> $\epsilon$ 4 (-) | 67/273           | 1.00 | 22/95            | 1.15 (0.57-2.30)        |                          |
|                         |                                            | <i>APOE</i> $\epsilon$ 4(+)  | 22/48            | 1.00 | 4/17             | 0.82 (0.18-3.79)        |                          |
| 3                       | Hap3: GT<br>(9%)                           | All                          | 91/356           | 1.00 | 24/77            | 0.89 (0.43-1.85)        | 0.74                     |
|                         |                                            | <i>APOE</i> $\epsilon$ 4 (-) | 70/303           | 1.00 | 19/65            | 0.88 (0.39-1.99)        |                          |
|                         |                                            | <i>APOE</i> $\epsilon$ 4(+)  | 21/53            | 1.00 | 5/12             | 1.09 (0.23-5.14)        |                          |

Block2 included only one htSNP and was excluded from the haplotype analysis. Abbreviations: VaD, vascular dementia; AOR, adjusted odds ratio; CI, confidence interval; *APOE*, apolipoprotein E; NA, not applicable. All models were adjusted for age, sex, *APOE*  $\epsilon$ 4, and education years and conditional on 5-year age strata.
